# Supplementary material for: Spectral demixing-enhanced dual-color pair correlation function: Application to the study of host-pathogen protein interaction
Source: Research Square preprint supplement (doi:10.21203/rs.3.rs-7615108/v1), 2025-11-03
Supplement: Supplementary file 2 [file e83147993325472f021251f2.pdf]

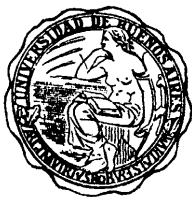

**UNIVERSIDAD DE BUENOS AIRES**  
**FACULTAD DE CIENCIAS EXACTAS Y NATURALES**

---

September 14th, 2025

Dear Nature Communications Editorial Team,

As the senior authors of the manuscript entitled "*Spectral demixing-enhanced dual-color pCF: Application to the study of host-pathogen protein interaction*", co-authored with PhD students Natalia Philipp and Melina Magalnik, and junior scientist Berta Pozzi, we are getting in contact with you to formally request a full waiver of the publication fees for this submission, as we require financial assistance to support the publication costs of our work.

As you may be aware, Argentina is once again making headlines, but for the wrong reasons. We have had five Nobel laureates in our history [1], four of whom are in science. However, scientific research in Argentina, following the change of government in December 2023, is once again suffering severe and drastic cuts in funding, salaries, scholarships, and general governmental support. Many articles, news, and commentaries about this situation have appeared in Nature and Science magazines, among other sources. Government actions such as the closure of the Ministry of Science and Technology [2], drastic spending cuts, and dismantlement of the scientific system [3,4], and the President's inflammatory public discourse [5] have eroded social trust in science, viewing as a mainly entrepreneurial, private sector activity, with a focus on very narrow applied projects [6]. Sixty-eight Nobel laureates worldwide signed a letter of concern [7] about the governmental plans to cut science and education, observing how these measures "will destroy a system that took many years to build, and that would take many, many more to rebuild."

In addition, inflation (220% in 2023, [8]), devaluation (50% since the change of government in December 2023, [9]), and poverty (currently near 57% [10]) are on the rise. Surprisingly, the World Bank still lists Argentina as an "upper-middle-income" country.

All this makes the purchasing power of our hardly remaining grants (in Argentine pesos) shrink, becoming almost useless in terms of covering the minimum needs of laboratory daily expenses.

Laura Estrada  
lestrada@df.uba.ar

Anabella Srebrow  
asrebrow@fbmc.fcen.uba.ar



**UNIVERSIDAD DE BUENOS AIRES**  
**FACULTAD DE CIENCIAS EXACTAS Y NATURALES**

---

Altogether, the current circumstances make Nature Communications' (as well as many other journals) publication fee unattainable for us. We have long been committed to the best practices in scientific research, as can be seen in our publication records, so we are requesting a full waiver to keep our science competitive even under this dire situation.

At the time being, it is more important than ever to be able to publish the work of our laboratories in a prestigious and highly ranked journal, such as Nature Communications. Looking forward to a positive response, we thank you in advance for your consideration.

Sincerely,

Professor Laura C. Estrada, PhD.

Professor Anabella Srebrow, PhD.

- [1] [https://en.wikipedia.org/wiki/List\\_of\\_Nobel\\_laureates\\_by\\_country#Argentina](https://en.wikipedia.org/wiki/List_of_Nobel_laureates_by_country#Argentina)
- [2] <https://council.science/current/blog/support-for-the-integrity-of-argentinas-science-system>
- [3] <https://www.nature.com/articles/d41586-024-00628-1>
- [4] <https://www.science.org/content/article/argentine-scientists-scrimp-and-save-their-way-through-funding-crisis>
- [5] <https://www.science.org/content/article/argentina-s-new-president-has-nation-s-scientists-very-very-concerned>
- [6] <https://www.science.org/content/article/argentina-s-controversial-new-science-head-faces-protests-over-cuts-and-privatization>

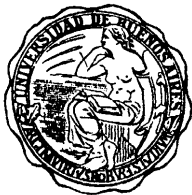

# UNIVERSIDAD DE BUENOS AIRES

## FACULTAD DE CIENCIAS EXACTAS Y NATURALES

---

- [7] <https://buenosairesherald.com/politics/nobel-laureates-urge-milei-to-reverse-science-funding-cuts>
- [8] <https://www.forbes.com/advisor/au/personal-finance/countries-with-highest-interest-inflation-rates/>
- [9] <https://fortune.com/2023/12/13/argentina-devalues-peso-currency-half-inflation-143-javier-milei-luis-caputo>
- [10] <https://www.batimes.com.ar/news/economy/uca-poverty-in-argentina-hit-20-year-high-of-574-in-january.phtml>
